# Supplementary material
Source: publisher figshare collection journal article supplement (https://sage.figshare.com/ndownloader/files/17830037)
Supplement: Supplementary file 1 [file 17830037]

## Sheet: All Autocratic Parties
Country	ccode	Party	Year Founded	Year in Power	Last Year of Power	Allowed Competition?	Origin	How Power Gained	How Power Ended	Democracy Year After?	Accession to Democracy?	In Power from Independence?	Renaming?	Marxist?	Military	Monarchy	Violence	Occupation	Competitive Oligarchy or Auth?	Competitive Parties	Evolution from Preceding Party?	Last in Spell Before Democratization?	Next Year of Democratization	Party Remains in Democracy?	Party Competitive in Democracy?	Party in Power in Democracy?	Party Remains in Democracy (Any)?	Party Competitive in Democracy (Any)?	Party in Power in Democracy (Any)?	Years Existing in Democracy	Years Competitive in Democracy	Years in Power in Democracy	Military Ally?	Governance Strategy	Favors Specific Ethnicity/Group?
Afghanistan	700	N		1930	1973	0				0	0					1
Afghanistan	700	National Revolutionary Party of Afghanistan	1974	1974	1977	0	Dictator-Created	Dictator-Created	Revolution	0	0	0		0
Afghanistan	700	People's Democratic Party of Afghanistan / Homeland Party	1965	1978	1991	0	Communist	Revolution	Civil War	0	0	0	1990	1
Afghanistan	700	N		1992	2000					0	0						1
Afghanistan	700	N		2001	N	1				0	0							1
Albania	339	N		1940	1945					0	0							1
Albania	339	Communist Party of Albania / Party of Labour of Albania / Socialist Party of Albania	1941	1946	1991	1990	Communist	Communist-Imposed	Election	1	1	0	1948, 1991	1								1	1992	1	1	0	1	1	1	1992-1995, 1997-2015	1992-1995, 1997-2015	1997-2005, 2013-2015	1	Policy-Based/Repressive	0
Albania	339	Democratic Party of Albania	1990	1996	1996	1	Elite Coalition	Election	Protests/Election	1	0	0		0								1	1997	1	1	1	1	1	1	1997-2015	1997-2015	2005-2013	0	Policy-Based	0
Algeria	615	National Liberation Front (FLN)	1954	1962	1991	1990	Revolution	Revolution	Coup	0	0	1		0
Algeria	615	N		1992	1996					0	0						1
Algeria	615	National Rally for Democracy	1997	1997	1999	1	Dictator-Created	Election	Election	0	0	0		0
Algeria	615	National Liberation Front (FLN)	1954	2000	N	1	Revolution	Election	N/A	0	0	0		0
Angola	540	People's Movement for the Liberation of Angola	1956	1975	N	1992	Revolution	Revolution	N/A	0	0	1		1
Antigua and Barbuda	58	Antigua Labour Party (ALP)	1946	1982	2003	1	Elite Coalition	Election	Election	1	1	1		0								1	2004	1	1	1	1	1	1	2004-2015	2004-2015	2014-2015	1	Clientelist	0
Argentina	160	National Democratic Party (Concordance Alliance)	1931	1931	1942	1	Elite Coalition	Election	Coup	0	0	0		0								0	1958	0	0	0	0	0	0						0
Argentina	160	N		1943	1945					0	0				1
Argentina	160	Labour Party	1945	1946	1947	1	Elite Coalition	Election	Dictator-Supported	0	0	0		0								0	1958	0	0	0	0	0	0						0
Argentina	160	Justicialist Party	1947	1948	1954	1	Dictator-Created	Dictator-Created	Coup	0	0	0		0							1	1	1958	0	0	0	1	1	1	1973-1975, 1983-2015	1973-1975, 1983-2015	1973-1975, 1989-1999, 2003-2009, 2011-2015	0	Policy-Based/Repressive	0
Argentina	160	N		1955	1957					1	1				1
Argentina	160	N		1962	1962					1	1				1
Argentina	160	N		1966	1972					1	1				1
Argentina	160	N		1976	1982					1	1				1
Armenia	371	Pan-Armenian National Movement (PANM, or HHSh)	1988	1991	1998	1	Independence	Election	Election	0	0	1		0
Armenia	371	Republican Party of Armenia (RPA, or HHK)	1990	1999	N	1	Independence	Election	N/A	0	0	0		0
Austria	305	Fatherland Front [Austria]	1933	1933	1938	0	Dictator-Created	Dictator-Created	Occupation	0	0	0		0								1	1946	0	0	0	0	0	0				1	Repressive	1
Austria	305	N		1939	1945					1	1							1
Azerbaijan	373	Azerbaijan Communist Party	1920	1920	1991	0	Communist	Communist-Imposed	Election	0	0	1		1
Azerbaijan	373	Azerbaijani Popular Front Party (APFP)	1988	1992	1992	1	Independence	Election	Election	0	0	1		0
Azerbaijan	373	New Azerbaijan Party	1992	1993	N	1	Elite Coalition	Election	N/A	0	0	0		0
Bahrain	692	N		1971	N	0				0	0					1
Bangladesh	771	Bangladesh Awami League	1949	1971	1974	1	Revolution	Election	Coup	0	0	1		0								0	1991	1	1	1	1	1	1	1991-2006, 2009-2013	1991-2006, 2009-2013	1996-2001, 2009-2015			1
Bangladesh	771	N		1975	1977					0	0				1
Bangladesh	771	Bangladesh Nationalist Party	1978	1978	1981	1	Dictator-Created	Dictator-Created	Coup	0	0	0		0								0	1991	1	1	1	1	1	1	1991-2006, 2009-2013	1991-2006, 2009-2013	1991-1996, 2001-2006			0
Bangladesh	771	N		1982	1985					0	0				1
Bangladesh	771	Jatiya Party (Ershad)	1986	1986	1990	1	Dictator-Created	Dictator-Created	Election	1	1	0		0								1	1991	1	1	0	1	1	0	1991-2006, 2009-2013	1991-2001		1	Repressive	0
Bangladesh	771	N		2007	2008					1	1				1
Bangladesh	771	Bangladesh Awami League	1949	2014	N	1	Revolution	Election	N/A	0	0	0		0
Belarus	370	N		1994	N					0	0
Benin	434	Dahomeyan Unity Party	1960	1960	1962	0	Merger	Election	Coup	0	0	1		0								0	1991	0	0	0	0	0	0						1
Benin	434	Dahomeyan Democratic Party	1963	1963	1964	0	Dictator-Created	Dictator-Created	Coup	0	0	0		0								0	1991	0	0	0	0	0	0						1
Benin	434	N		1965	1974					0	0				1
Benin	434	People's Revolutionary Party of Benin	1975	1975	1990	0	Dictator-Created	Dictator-Created	Election	1	1	0		1								1	1991	1	0	0	1	0	0	1991-2015			1	Clientelist/Policy-Based	0
Bhutan	760	N		1930	2007	2007				0	0					1
Bhutan	760	N		2008	N	1				0	0								1	Bhutan Peace and Prosperity Party, People's Democratic Party
Bolivia	145	Concordance	1939	1940	1942	1	Elite Coalition	Election	Coup	0	0	0		0								0	1979	0	0	0	0	0	0						0
Bolivia	145	N		1943	1946					0	0				1
Bolivia	145	Republican Socialist Unity Party	1946	1947	1950	1	Merger	Election	Coup	0	0	0		0								0	1979	0	0	0	0	0	0						0
Bolivia	145	N		1951	1951					0	0				1
Bolivia	145	Revolutionary Nationalist Movement	1941	1952	1963	1	Elite Coalition	Revolution	Coup	0	0	0		0								0	1979	1	1	0	1	1	1	1979, 1982-2015	1979, 1982-2006	1985-1997, 2002-2005			0
Bolivia	145	N		1964	1965					0	0				1
Bolivia	145	Popular Christian Movement	1966	1966	1968	1	Military	Military	Coup	0	0	0		0								1	1979	0	0	0	0	0	0				1	Policy-Based	0
Bolivia	145	N		1969	1978					1	1				1
Bolivia	145	N		1980	1981					1	1				1
Brazil	140	N		1937	1945					1	1				1
Brazil	140	National Renewal Alliance / Democratic Social Party	1964	1964	1984	1	Military	Military	Election	1	1	0		0								1	1985	1	1	0	1	1	0	1985-1995	1985-1990		1	Clientelist/Policy-Based	0
Brunei	835	N		1985	N					0	0					1
Bulgaria	355	N		1935	1943	0				0	0
Bulgaria	355	Fatherland Front [Bulgaria]	1943	1944	1945	0	Revolution	Coup	Split	0	0	0		0								0	1990	0	0	0	0	0	0						0
Bulgaria	355	Bulgarian Communist Party	1903	1946	1989	0	Communist	Communist-Imposed	Protests/Election	1	1	0		1							1	1	1990	1	1	1	1	1	1	1990-2015	1990-2015	1990-1991, 1994-1997, 2005-2009	1	Policy-Based/Repressive	0
Burkina Faso	439	Voltaic Democratic Union-African Democratic Rally (UDV-RDA)	1957	1960	1965	0	Independence	Election	Coup	0	0	1		1
Burkina Faso	439	N		1966	1970					0	0				1
Burkina Faso	439	Voltaic Democratic Union-African Democratic Rally (UDV-RDA)	1957	1971	1973	1	Independence	Election	Coup	0	0	0		1
Burkina Faso	439	N		1974	1977					0	0				1
Burkina Faso	439	National Movement for Renewal	1974	1978	1979	0	Dictator-Created	Election	Coup	0	0	0		0
Burkina Faso	439	N		1980	1988					0	0				1
Burkina Faso	439	Popular Front / Organization for Popular Democracy – Labour Movement / Congress for Democracy and Progress (CDP)	1987	1989	2013	1	Dictator-Created	Dictator-Created	Coup	0	0	0	1991, 1996	1
Burkina Faso	439	N		2014	2014					0	0				1
Burkina Faso	439	People's Movement for Progress (MPP)	2014	2015	N	1	Elite Coalition	Election	N/A	0	0	0		0
Burundi	516	N		1962	1965					0	0				1	1
Burundi	516	Union for National Progress (UPRONA)	1960	1966	1975	0	Military	Military	Coup	0	0	0		0								0	2005	1	0	0	1	0	0	2005-2015					1
Burundi	516	N		1976	1978					0	0				1
Burundi	516	Union for National Progress (UPRONA)	1960	1979	1992	0	Military	Military	Election	0	0	0		0								0	2005	1	0	0	1	0	0	2005-2015					1
Burundi	516	N		1993	2002					0	0						1
Burundi	516	Front for Democracy in Burundi (FRODEBU)	1986	2003	2004	0	Elite Coalition	Dictator-Supported	Election	1	1	0		1								1	2005	1	1	0	1	1	0	2005-2015	2005-2010		1	Policy-Based	1
Cambodia	811	N		1953	1954					0	0					1
Cambodia	811	Sangkum (Community)	1955	1955	1969	0	Dictator-Created	Election	Coup	0	0	0		0
Cambodia	811	N		1970	1971					0	0				1
Cambodia	811	Social Republican Party	1972	1972	1974	0	Dictator-Created	Election	Revolution	0	0	0		0
Cambodia	811	Communist Party of Kampuchea (Khmer Rouge)	1951	1975	1978	0	Communist	Revolution	Coup	0	0	0		1
Cambodia	811	N		1979	1980					0	0							1
Cambodia	811	Kampuchean People's Revolutionary Party / Cambodian People's Party	1979	1981	N	1991	Split	Foreign-Imposed/Election	N/A	0	0	0	1991	1
Cameroon	471	Cameroon National Union / Cameroonian Union / Cameroon People's Democratic Movement (CPDM or RDPC)	1958	1960	N	1990	Independence	Election	N/A	0	0	1	1966, 1985	0
Cape Verde	402	African Party for the Independence of Guinea and Cape Verde (PAIGC)	1956	1975	1980	0	Revolution	Revolution	Coup	0	0	1		1								0	1991	0	0	0	0	0	0						0
Cape Verde	402	African Party of Independence of Cape Verde (PAICV)	1981	1981	1990	0	Dictator-Created/Split	Dictator-Created	Election	1	1	0		1							1	1	1991	1	1	1	1	1	1	1991-2015	1991-2015	2001-2015	1	Policy-Based	0
Central African Republic	482	Movement for the Social Evolution of Black Africa (MESAN)	1949	1960	1978	0	Independence	Election	Coup	0	0	1		0								0	1993	1	0	0	1	0	0	1993-2002					0
Central African Republic	482	Central African Democratic Union	1979	1979	1980	0	Dictator-Created	Dictator-Created	Coup	0	0	0		0								0	1993	0	0	0	0	0	0						0
Central African Republic	482	N		1981	1986					0	0				1
Central African Republic	482	Central African Democratic Rally	1987	1987	1992	1992	Dictator-Created	Dictator-Created	Election	1	1	0		0								1	1993	1	1	0	1	1	0	1993-2002	1993-2002		1	Repressive	0
Central African Republic	482	N		2003	2004					0	0				1
Central African Republic	482	National Convergence "Kwa Na Kwa"	2004	2005	2012	1	Dictator-Created	Election	Revolution	0	0	0		0
Central African Republic	482	N		2013	N					0	0						1
Chad	483	Chadian Progressive Party / National Movement for the Cultural and Social Revolution	1947	1960	1974	-1962	Elite Coalition	Election	Coup	0	0	1	1973	0
Chad	483	N		1975	1983					0	0				1		1
Chad	483	National Union for Independence and Revolution	1984	1984	1989	0	Dictator-Created	Dictator-Created	Revolution	0	0	0		0
Chad	483	Patriotic Salvation Movement	1990	1990	N	1996	Revolution	Revolution	N/A	0	0	0		0
Chile	155	N		1973	1989					1	1				1
China	710	Kuomintang	1911	1928	1948	0	Revolution	Revolution	Revolution	0	0	0		0
China	710	Communist Party of China	1921	1949	N	0	Communist	Revolution	N/A	0	0	0		1
Colombia	100	Colombian Conservative Party	1849	1948	1952	1	Elite Coalition	Election	Coup	0	0	0		0								0	1958	1	1	1	1	1	1	1958-2015	1958-2015	1962-1966, 1970-1974, 1982-1986			0
Colombia	100	N		1953	1954					0	0				1
Colombia	100	Popular Action Movement	1955	1955	1957	0	Dictator-Created	Dictator-Created	Coup	1	0	0		0								1	1958	0	0	0	0	0	0				1	Repressive	0
Comoros	581	N		1975	1975					0	0				1
Comoros	581	Democratic Rally of the Comorian People (RDPC)	1968	1976	1977	1	Elite Coalition	Dictator-Supported	Coup	0	0	0		0								0	2006	0	0	0	0	0	0						0
Comoros	581	Comorian Democratic Union	1968	1978	1981	0	Elite Coalition	Dictator-Supported	Dictator-Supported	0	0	0		0								0	2006	0	0	0	0	0	0						0
Comoros	581	Comorian Union for Progress	1982	1982	1992	1989	Dictator-Created	Dictator-Created	Dictator-Supported	0	0	0		0								0	2006	1	0	0	1	0	0	2015					1
Comoros	581	Rally for Democracy and Renewal	1993	1993	1995	1	Dictator-Created	Dictator-Created	Merger	0	0	0		0								0	2006	1	0	0	1	0	0	2015					1
Comoros	581	National Rally for Development	1996	1996	1998	1	Dictator-Created/Merger	Election	Coup	0	0	0		0							1	1	2006	1	0	0	1	0	0	2015			1	Policy-Based	1
Comoros	581	N		1999	2005					1	1						1
Republic of Congo	484	Democratic Union for the Defence of African Interests	1956	1963	1963	-1963	Elite Coalition	Election	Revolution	0	0	1		0
Republic of Congo	484	National Revolutionary Movement	1964	1964	1968	0	Dictator-Created	Dictator-Created	Coup	0	0	0		1
Republic of Congo	484	Congolese Party of Labour	1969	1969	1991	1990	Military	Military	Election	0	0	0		1
Republic of Congo	484	Pan-African Union for Social Democracy	1991	1992	1996	1	Elite Coalition	Election	Revolution	0	0	0		0
Republic of Congo	484	Congolese Party of Labour	1969	1997	N	1	Military	Revolution	N/A	0	0	0		1
Democratic Republic of Congo	490	Association of the Bakongo People (Bakongos' Alliance)	1955	1960	1964	1	Independence	Election	Coup	0	0	1		0
Democratic Republic of Congo	490	N		1965	1966					0	0				1
Democratic Republic of Congo	490	Popular Movement of the Revolution (MPR)	1967	1967	1996	1990	Dictator-Created	Dictator-Created	Election	0	0	0		0
Democratic Republic of Congo	490	N		1997	2002					0	0						1
Democratic Republic of Congo	490	People's Party for Reconstruction and Democracy	2002	2003	N	1	Dictator-Created	Dictator-Created	N/A	0	0	0		0
Costa Rica	94	(Independent) National Republican Party (PRN)	1932	1932	1947	1	Elite Coalition	Election	Civil War	0	0	0		1								1	1949	1	1	1	1	1	1	1966-1978	1966-1974	1966-1970	0	Policy-Based	0
Costa Rica	94	N		1948	1948					1	1						1
Croatia	344	Croatian Democratic Union (HDZ)	1989	1991	1999	1	Elite Coalition	Election	Election	1	1	1		0								1	2000	1	1	1	1	1	1	2000-2015	2000-2015	2003-2011, 2015	1	Policy-Based	1
Cuba	40	Progressive Action Party	1952	1953	1958	1	Dictator-Created	Dictator-Created	Revolution	0	0	0		0
Cuba	40	26th of July Movement / United Party of the Cuban Socialist Revolution / Communist Party of Cuba	1953	1959	N	0	Communist	Revolution	N/A	0	0	0	1962, 1965	1
Cyprus	352	N		1960	1976					1	1
Czechoslovakia	315	Communist Party of Czechoslovakia	1921	1947	1989	-1947	Communist	Communist-Imposed	Protests/Election	1	1	0		1								1	1990	1	1	0	1	1	0	1990-1992	1990-1992		1	Policy-Based/Repressive	0
Djibouti	522	People's Rally for Independence / People's Rally for Progress	1977	1977	N	-1981, 1992	Independence	Dictator-Supported	N/A	0	0	1	1979	0
Dominican Republic	42	Dominican Party	1931	1931	1961	0	Dictator-Created	Dictator-Created	Dictator-Supported	0	0	0		0								1	1966	0	0	0	0	0	0				1	Repressive	0
Dominican Republic	42	N		1962	1965					1	1				1		1
Ecuador	130	Ecuadorian Radical Liberal Party	1878	1940	1943	1	Elite Coalition	Election	Revolution	0	0	0		0								0	1948	1	1	0	1	1	0	1948-1962, 1979-1994	1948-1962, 1979				0
Ecuador	130	Conservative Party	1869	1944	1946	1	Elite Coalition	Dictator-Supported	Coup	0	0	0		0								1	1948	1	1	1	1	1	1	1948-1962	1948-1960	1950-1954, 1956-1960	0	Policy-Based	0
Ecuador	130	N		1947	1947					1	1				1
Ecuador	130	N		1963	1965					0	0				1
Ecuador	130	Democratic Institutionalist Coalition	1965	1966	1967	1	Dictator-Created	Election	Election	0	0	0		0								0	1979	1	0	0	1	0	0	1979					0
Ecuador	130	Velasquista National Federation	1952	1968	1971	1	Dictator-Created	Election	Coup	0	0	0		0								1	1979	0	0	0	0	0	0				0	Policy-Based	0
Ecuador	130	N		1972	1978					1	1				1
Ecuador	130	Popular Democracy / Christian Democratic Union	1977	2000	2002	1	Split	Election	Election	1	1	0		0								1	2003	1	0	0	1	0	0	2003-2013			1	Policy-Based	1
Egypt	651	N		1922	1951	1				0	0					1			1	Wafd Party, Liberal Constitutional Party, Saadist Institutional Party
Egypt	651	N		1952	1953					0	0				1
Egypt	651	Liberation Rally / National Union / Arab Socialist Union	1952	1954	1977	1975	Dictator-Created	Dictator-Created	Dictator-Supported	0	0	0	1956, 1962	0
Egypt	651	National Democratic Party (NDP) [Egypt]	1978	1978	2010	1	Dictator-Created/Split	Dictator-Created	Protests/Coup	0	0	0		0							1
Egypt	651	N		2011	2011					0	0				1
Egypt	651	Freedom and Justice Party	2011	2012	2012	1	Elite Coalition	Election	Coup	0	0	0		0
Egypt	651	N		2013	N					0	0				1
El Salvador	92	National Pro-Patria Party	1931	1931	1944	0	Dictator-Created	Dictator-Created	Protests/Coup	0	0	0		0								0	1984	0	0	0	0	0	0						0
El Salvador	92	Unification Social Democratic Party	1945	1945	1947	0	Dictator-Created	Dictator-Created	Coup	0	0	0		0							1	0	1984	0	0	0	0	0	0						0
El Salvador	92	N		1948	1949					0	0				1
El Salvador	92	Revolutionary Party of Democratic Unification	1945	1950	1961	0	Military	Military	Coup	0	0	0		0								0	1984	0	0	0	0	0	0						0
El Salvador	92	National Conciliation Party	1961	1962	1978	1	Military	Military	Coup	0	0	0		0								0	1984	1	1	0	1	1	0	1984-2015	1984-2015				0
El Salvador	92	N		1979	1980					0	0				1
El Salvador	92	Nationalist Republican Alliance (ARENA)	1981	1981	1983	1	Military	Military	Election	1	1	0		0								1	1984	1	1	1	1	1	1	1984-2015	1984-2015	1988-2009, 2012-2015	1	Policy-Based/Repressive	0
Equatorial Guinea	411	Popular Idea of Equatorial Guinea (IPGE)	1958	1968	1971	1	Independence	Election	Dictator-Supported	0	0	1		0
Equatorial Guinea	411	United National Workers' Party (PUNT)	1972	1972	1978	0	Dictator-Created	Dictator-Created	Coup	0	0	0		0
Equatorial Guinea	411	N		1979	1987					0	0				1
Equatorial Guinea	411	Democratic Party of Equatorial Guinea	1987	1988	N	0	Dictator-Created	Dictator-Created	N/A	0	0	0		0
Eritrea	531	Eritrean People's Liberation Front / People's Front for Democracy and Justice	1970	1993	N	0	Revolution	Revolution	N/A	0	0	1	1994	1
Estonia	366	N		1934	1940					0	0
Ethiopia	530	N		1936	1940					0	0							1
Ethiopia	530	N		1941	1978					0	0				1	1
Ethiopia	530	Commission for Organizing the Party of the Working People of Ethiopia / Ethiopian Workers' Party	1979	1979	1990	0	Dictator-Created	Dictator-Created	Revolution	0	0	0	1984	1
Ethiopia	530	Ethiopian People's Revolutionary Democratic Front	1989	1991	1992	1	Revolution	Revolution	Continued	0	0	0		1
Ethiopia	529	Ethiopian People's Revolutionary Democratic Front	1989	1993	N	1	Revolution	Revolution	N/A	0	0	0		1
Fiji	950	N		1987	1991					0	0				1
Fiji	950	Fijian Political Party (Soqosoqo ni Vakavulewa ni Taukei)	1990	1992	1999	1	Elite Coalition	Election	Election	0	0	0		0								0	2014	0	0	0	0	0	0				1	Clientelist/Policy-Based	1
Fiji	950	N		2000	2000					0	0						1
Fiji	950	United Fiji Party (Soqosoqo Duavata ni Lewenivanua)	2001	2001	2005	1	Dictator-Created	Election	Coup	0	0	0		0								1	2014	1	1	0	1	1	0	2014-2015	2014-2015		1	Policy-Based	1
Fiji	950	N		2006	2013					1	1				1
France	220	N		1940	1945					1	1							1
Gabon	481	Gabonese Democratic Bloc / Gabonese Democratic Party	1953	1960	N	-1967, 1990	Merger	Election	N/A	0	0	1	1967	0
Gambia	420	People's Progressive Party	1959	1965	1971	1	Elite Coalition	Election	Continued	1	1	1		0
Gambia	420	N		1994	1995					0	0				1
Gambia	420	Alliance for Patriotic Reorientation and Construction	1996	1996	N	1	Dictator-Created	Dictator-Created	N/A	0	0	0		0
Georgia	372	Round Table - Free Georgia	1990	1991	1991	1	Independence	Election	Coup	0	0	1		0								0	2004	0	0	0	0	0	0						0
Georgia	372	N		1992	1994					0	0				1
Georgia	372	Union of Citizens of Georgia (SMK)	1995	1995	2003	1	Dictator-Created	Election	Protests/Election	1	0	0		0								1	2004	0	0	0	0	0	0				1	Clientelist	0
Germany	255	National Socialist German Workers' Party (NSDAP)	1920	1933	1945	0	Elite Coalition	Election	Occupation	1	0	0		0
Germany (East)	265	N		1945	1945					0	0							1
Germany (East)	265	Socialist Unity Party of Germany / Party of Democratic Socialism	1946	1946	1990	0	Communist	Communist	Protests/Election	1	1	1	1989	1
Ghana	452	Convention People's Party (CPP)	1949	1957	1965	-1964	Independence	Election	Coup	0	0	1		1								1	1970	0	0	0	1	0	0	1997-2015			0	Policy-Based/Repressive	0
Ghana	452	N		1966	1969					1	1				1
Ghana	452	N		1972	1978					1	1				1
Ghana	452	N		1981	1991					0	0				1
Ghana	452	National Democratic Congress (NDC)	1992	1992	1996	1	Military	Military	Continued	1	1	0		0								1	1997	1	1	1	1	1	1	1997-2015	1997-2015	1997-2000, 2008-2015	1	Policy-Based	0
Greece	350	N		1936	1943					1	1				1			1
Greece	350	N		1967	1973					1	1				1
Grenada	55	New Jewel Movement	1973	1979	1983	0	Revolution	Revolution	Occupation	1	0	0		1								1	1984	0	0	0	0	0	0				1	Policy-Based/Repressive	0
Guatemala	90	Liberal Progressive Party	1931	1931	1944	0	Dictator-Created	Dictator-Created	Coup	1	0	0		0								1	1945	0	0	0	0	0	0				1	Policy-Based	0
Guatemala	90	National Democratic Movement	1954	1954	1957	1	Military	Military	Election	1	1	0		0								1	1958	1	1	1	1	1	1	1958-1962, 1966-1981, 1986-1999	1959-1962, 1966-1981, 1986-1990	1961-1962, 1970-1981	1	Repressive	0
Guatemala	90	Institutional Democratic Party (PID)	1963	1963	1965	1	Dictator-Created	Dictator-Created	Election	1	1	0		0								1	1966	1	1	1	1	1	1	1966-1981, 1986-1990	1966-1981, 1986-1990	1970-1981	1	Policy-Based	0
Guatemala	90	N		1982	1985	1983				1	1				1
Guinea	438	Democratic Party of Guinea-African Democratic Rally	1947	1958	1983	-1959	Independence	Election	Coup	0	0	1		1
Guinea	438	N		1984	1991					0	0				1
Guinea	438	Unity and Progress Party	1992	1992	2007	1	Dictator-Created	Dictator-Created	Coup	0	0	0		0
Guinea	438	N		2008	2009					0	0				1
Guinea	438	Rally of the Guinean People (RPG)	1992	2010	N	1	Elite Coalition	Election	N/A	0	0	0		0
Guinea-Bissau	404	African Party for the Independence of Guinea and Cape Verde (PAIGC)	1956	1974	1993	1991	Revolution	Revolution	Continued	1	1	1		1
Guinea-Bissau	404	African Party for the Independence of Guinea and Cape Verde (PAIGC)	1956	1998	1999	1	Revolution	Election	Election	0	0	0		1
Guinea-Bissau	404	Party for Social Renewal	1992	2000	2003	1	Elite Coalition	Election	Coup	0	0	0		0
Guinea-Bissau	404	African Party for the Independence of Guinea and Cape Verde (PAIGC)	1956	2004	N	1	Revolution	Election	N/A	0	0	0		1								1	1994	1	1	1	1	1	1	1994-2015	1994-2015	1994-1999, 2004-2015	1	Policy-Based/Repressive	0
Guyana	110	People's National Congress	1957	1966	1991	1	Split	Election	Election	1	1	1		1								1	1992	1	1	1	1	1	1	1992-2015	1992-2015	2015	1	Policy-Based	1
Haiti	41	N		1915	1956					0	0				1
Haiti	41	National Unity Party (PUN) / National Progressive Party	1957	1957	1985	-1960	Dictator-Created	Election	Protests	0	0	0	1985	0
Haiti	41	N		1986	1993					0	0				1
Haiti	41	Lavalas Political Organization (OPL) / Struggling People's Organization (OPL)	1991	1994	2000	1	Elite Coalition	Foreign-Imposed	Election	0	0	0	1996	0
Haiti	41	Fanmi Lavalas (Lavalas Family)	1996	2001	2003	1	Dictator-Created	Election	Coup	0	0	0		0							1
Haiti	41	N		2004	2005					0	0						1
Haiti	41	Lespwa (Hope Front)	1995	2006	2008	1	Elite Coalition	Election	Dictator-Supported	0	0	0		0
Haiti	41	Inite (Patriotic Unity)	2009	2009	2010	1	Dictator-Created	Dictator-Created	Election	0	0	0		0							1
Haiti	41	N		2011	N	1				0	0								1	Inite/Patriotic Unity, Repons Peyizan, Haitian Tèt Kale Party, Truth
Honduras	91	National Party of Honduras	1902	1933	1953	1	Elite Coalition	Election	Dictator-Supported	0	0	0		0								0	1957	1	1	0	1	1	1	1957-1962, 1971, 1982-2008, 2010-2015	1957-1962, 1971, 1982-2008, 2010-2015	1971, 1989-1993, 2001-2005, 2010-2015	1	Repressive	0
Honduras	91	Party of National Unity	1954	1954	1956	1	Dictator-Created	Dictator-Created	Coup	1	0	0		0								1	1957	0	0	0	0	0	0				0	Policy-Based	0
Honduras	91	National Party of Honduras	1902	1963	1970	1	Elite Coalition	Military	Continued	1	1	0		0								1	1971	1	1	1	1	1	1	1971, 1982-2008, 2010-2015	1971, 1982-2008, 2010-2015	1971, 1989-1993, 2001-2005, 2010-2015	1	Repressive	0
Honduras	91	N		1972	1981					1	1				1
Honduras	91	N		2009	2009					1	1				1
Hungary	310	N		1940	1945					0	0				1			1
Hungary	310	Hungarian Communist Party / Hungarian Working People's Party	1918	1946	1955	-1948	Communist	Communist-Imposed	Revolution	0	0	0	1948	1								0	1990	0	0	0	0	0	0						0
Hungary	310	Hungarian Socialist Workers' Party	1956	1956	1989	0	Communist	Communist-Imposed	Election	1	1	0		1							1	1	1990	1	1	1	1	1	1	1990-2015	1990-2015	1994-1998, 2002-2010	1	Policy-Based/Repressive	0
Indonesia	850	N		1945	1945					0	0
Indonesia	850	Indonesian National Party	1928	1946	1954	0	Revolution	Dictator-Supported	Continued	1	1	0		0								1	1955	1	1	1	1	1	1	1955-1956	1955-1956	1955-1956	0	Policy-Based	0
Indonesia	850	Indonesian National Party	1928	1957	1964	0	Revolution	Dictator-Supported	Coup	0	0	0		0								0	1999	0	0	0	0	0	0						0
Indonesia	850	N		1965	1970					0	0				1
Indonesia	850	Golkar (Party of the Functional Groups)	1964	1971	1998	1	Elite Coalition	Dictator-Supported	Protests/Election	1	1	0		0								1	1999	1	1	1	1	1	1	1999-2015	1999-2015	2004-2014	1	Policy-Based/Repressive	1
Iran	630	N		1925	1950	1				0	0								1	Revival Party, Democratic Party, National Front
Iran	630	National Front of Iran	1949	1951	1952	1	Elite Coalition	Election	Coup	0	0	0		0
Iran	630	N		1953	1962	1956				0	0				1	1
Iran	630	New Iran Party	1963	1963	1974	1	Elite Coalition	Election	Merger	0	0	0		0
Iran	630	Resurgence Party	1975	1975	1978	0	Dictator-Created/Merger	Dictator-Created	Revolution	0	0	0		0							1
Iran	630	Islamic Republican Party	1979	1979	1987	0	Revolution	Revolution	Dictator-Supported	0	0	0		0
Iran	630	N		1988	N	1				0	0								1	Combatant Clergy Association
Iraq	645	N		1940	1963					0	0				1	1
Iraq	645	Iraqi Arab Socialist Union	1964	1964	1967	0	Dictator-Created	Dictator-Created	Coup	0	0	0		0
Iraq	645	Ba'ath Party [Iraq]	1951	1968	2002	0	Elite Coalition	Coup	Occupation	0	0	0		0
Iraq	645	N		2003	2004	0				0	0							1
Iraq	645	Islamic Dawa Party	1958	2005	N	1	Revolution	Election	N/A	0	0	0		0
Italy	325	National Fascist Party	1915	1922	1943	0	Revolution	Dictator-Supported/Revolution	Occupation	0	0	0		0								1	1946	0	0	0	0	0	0				1	Repressive	1
Italy	325	N		1944	1945					1	1							1
Ivory Coast	437	Democratic Party of Côte d'Ivoire — African Democratic Rally	1946	1960	1998	1990	Elite Coalition	Election	Coup	0	0	1		0
Ivory Coast	437	N		1999	1999					0	0				1
Ivory Coast	437	Ivorian Popular Front	1982	2000	2010	1	Elite Coalition	Election	Revolution/Election	0	0	0		0
Ivory Coast	437	Rally of the Republicans (RDR)	1994	2011	N	1	Split	Revolution/Election	N/A	0	0	0		0
Japan	740	N		1940	1951					1	1				1	1		1
Jordan	663	N		1946	N	1992				0	0					1
Kazakhstan	705	Communist Party of Kazakhstan (CPK)	1936	1991	1991	0	Communist	Dictator-Supported	Dictator-Supported	0	0	1		1
Kazakhstan	705	N		1992	1992					0	0
Kazakhstan	705	People's Union of Kazakhstan Unity	1993	1993	1998	1	Dictator-Created	Dictator-Created	Merger	0	0	0		0
Kazakhstan	705	Otan (Fatherland)	1999	1999	2005	1	Dictator-Created/Merger	Dictator-Created	Merger	0	0	0		0							1
Kazakhstan	705	"Nur Otan" Democratic People's Party	2006	2006	N	1	Dictator-Created/Merger	Dictator-Created	N/A	0	0	0		0							1
Kenya	501	Kenya African National Union	1942	1963	2001	-1968, 1991	Independence	Election	Election	1	1	1		0								1	2002	1	1	0	1	1	0	2002-2015	2002-2007		1	Clientelist	1
Korea (North)	731	Workers' Party of North Korea / Workers' Party of Korea	1946	1948	N	0	Communist	Communist-Imposed	N/A	0	0	1	1949	1
Korea (South)	732	N		1948	1951	0				0	0						1
Korea (South)	732	Liberal Party	1951	1952	1959	1	Dictator-Created	Dictator-Created	Protests/Election	1	1	0		0								1	1960	1	0	0	1	0	0	1960			1	Policy-Based	0
Korea (South)	732	N		1961	1962					0	0				1
Korea (South)	732	Democratic Republican Party	1963	1963	1978	1	Dictator-Created	Dictator-Created	Coup	0	0	0		0								0	1988	0	0	0	0	0	0						0
Korea (South)	732	N		1979	1979					0	0				1
Korea (South)	732	Democratic Justice Party (DJP)	1980	1980	1987	1	Dictator-Created	Dictator-Created	Continued	1	1	0		0								1	1988	1	1	1	1	1	1	1988-2015	1988-2015	1988-2004, 2007-2017	1	Policy-Based	0
Kuwait	690	N		1961	N					0	0					1
Kyrgyzstan	703	N		1991	2006					0	0
Kyrgyzstan	703	Ak Jol (White Path)	2007	2007	2009	1	Dictator-Created	Election	Revolution	0	0	0		0
Kyrgyzstan	703	Social Democratic Party of Kyrgyzstan	1993	2010	N	1	Elite Coalition	Election	N/A	0	0	0		0
Laos	812	N		1959	1974	1				0	0					1	1		1	National Progressive Party, Committee for the Defence of the National Interests, Lao Patriotic Front
Laos	812	Lao People's Revolutionary Party	1955	1975	N	0	Communist	Revolution	N/A	0	0	0		1
Latvia	367	N		1934	1940	0				0	0
Latvia	367	Communist Party of Latvia	1904	1991	1992	1	Communist	Communist-Imposed	Election	1	1	1		1								1	1993	1	0	0	1	0	0	1994-2015			1	Policy-Based/Repressive	0
Lebanon	660	N		1943	1970					1	1
Lebanon	660	N		1976	2004	1992				0	0						1
Lebanon	660	N		2005	N	1				0	0								1	March 14 Alliance (incl Future Movement), March 8 Alliance
Lesotho	570	Basotho National Party (BNP)	1959	1966	1985	1	Independence	Election	Coup	0	0	1		0								0	2002	1	1	0	1	1	0	2002-2015	2002-2007				0
Lesotho	570	N		1986	1993					0	0				1							0	2002	1	0	0	1	0	0	2002-2015					0
Lesotho	570	Basutoland Congress Party	1952	1994	1997	1	Elite Coalition	Election	Dictator-Supported	0	0	0		0
Lesotho	570	Lesotho Congress for Democracy	1997	1998	2001	1	Dictator-Created	Election	Continued	1	1	0		0								1	2002	1	1	1	1	1	1	2002-2015	2002-2015	2002-2012	0	Policy-Based	0
Liberia	450	True Whig Party	1869	1878	1979	0	Elite Coalition	Election	Coup	0	0	0		0								0	2006	1	0	0	1	0	0	2006-2015					1
Liberia	450	N		1980	1983					0	0				1
Liberia	450	National Democratic Party of Liberia (NDPL)	1984	1984	1989	1	Dictator-Created	Dictator-Created	Civil War	0	0	0		0								0	2006	1	0	0	1	0	0	2006-2015					1
Liberia	450	N		1990	1996					0	0						1
Liberia	450	National Patriotic Party (NPP)	1997	1997	2002	1	Revolution	Election	Revolution	0	0	0		0								1	2006	1	0	0	1	0	0	2006-2015			1	Repressive	1
Liberia	450	N		2003	2005					1	1						1
Libya	620	N		1951	N	0				0	0				1		1
Lithuania	368	Lithuanian Nationalist Union (LTS)	1924	1926	1940	-1935	Merger	Coup	Occupation	0	0	0		0								0	1992	0	0	0	0	0	0						0
Lithuania	368	Communist Party of Lithuania	1918	1991	1991	1	Communist	Communist-Imposed	Continued	1	1	1		1								1	1992	1	1	1	1	1	1	1992-2015	1992-2015	1992-1998, 2001-2004, 2012-2015	1	Policy-Based/Repressive	0
Madagascar	580	Social Democratic Party of Madagascar (PSD)	1956	1960	1971	1	Elite Coalition	Election	Protests	0	0	1		0								0	1993	1	0	0	1	0	0	1993					0
Madagascar	580	N		1972	1975	1				0	0				1
Madagascar	580	Vanguard of the Malagasy Revolution (Antokin'ny Revolisiona Malagasy – Arema) / Association for the Rebirth of Madagascar (AREMA)	1976	1976	1992	0	Dictator-Created	Dictator-Created	Protests/Election	1	1	0	1989	1								1	1993	1	1	1	1	1	1	1993-2008	1993-2002	1996-2001	1	Policy-Based	0
Madagascar	580	N		2009	N					0	0						1		1	Young Malagasies Determined, AVANA, Tiako I Madagasikara
Malawi	553	Malawi Congress Party	1959	1964	1993	0	Independence	Election	Election	1	1	1		0								1	1994	1	1	1	1	1	1	1994-2015	1994-2015	2004-2009	1	Policy-Based/Repressive	0
Malaysia	820	United Malays National Organization	1946	1957	N	1	Independence	Election	N/A	0	0	1		0
Maldives	781	N		1966	2004	0				0	0
Maldives	781	Maldivian People's Party (Dhivehi Rayyithunge Party, DRP)	2005	2005	2008	1	Dictator-Created	Election	Continued	1	1	0		0								1	2009	1	1	1	1	1	1	2009-2011	2009-2011	2009-2011	1	Policy-Based	0
Maldives	781	N		2012	2012	1				0	0
Maldives	781	Progressive Party of Maldives	2011	2013	N	1	Elite Coalition	Election	N/A	0	0	0		0
Mali	432	Sudanese Union-African Democratic Rally	1945	1960	1967	1	Independence	Election	Coup	0	0	1		0								0	1992	1	0	0	1	0	0	1992-2011					0
Mali	432	N		1968	1974	0				0	0				1
Mali	432	Democratic Union of the Malian People	1975	1975	1990	0	Military	Military	Coup	0	0	0		0								1	1992	0	0	0	0	0	0				1	Policy-Based/Repressive	0
Mali	432	N		1991	1991					1	1				1
Mali	432	N		2012	2012					0	0				1
Mali	432	Rally for Mali	2001	2013	N	1	Elite Coalition	Election	N/A	0	0	0		0
Mauritania	435	Mauritanian Regroupment Party	1958	1960	1960	0	Elite Coalition	Election	Dictator-Supported	0	0	1		0
Mauritania	435	Mauritanian People's Party	1961	1961	1977	0	Dictator-Created	Dictator-Created	Coup	0	0	0		0							1
Mauritania	435	N		1978	1991	1991				0	0				1
Mauritania	435	Social and Democratic Republican Party (PRDS)	1992	1992	2004	1	Dictator-Created	Election	Coup	0	0	0		0
Mauritania	435	N		2005	2008	1				0	0				1
Mauritania	435	Union for the Republic (UPR)	2009	2009	N	1	Dictator-Created	Election	N/A	0	0	0		0
Mexico	70	National Revolutionary Party / Mexican Revolutionary Party / Institutional Revolutionary Party (PRI)	1929	1929	1999	1	Elite Coalition	Election	Election	1	1	0	1938, 1946	0								1	2000	1	1	1	1	1	1	2000-2015	2000-2015	2003-2006, 2009-2015	1	Clientelist/Policy-Based	0
Mongolia	712	Mongolian People's Revolutionary Party	1921	1921	1989	0	Communist	Revolution	Continued	1	1	1		1								1	1990	1	1	1	1	1	1	1990-2015	1990-2015	1990-1996, 2000-2012	1	Policy-Based/Repressive	0
Morocco	600	N		1956	1962					0	0					1
Morocco	600	N		1963	N					0	0					1			1	Istiqlal, Justice and Development Party, Socialist Union of Popular Forces
Mozambique	541	Liberation Front of Mozambique (FRELIMO)	1962	1975	1993	1990	Revolution	Revolution	Continued	1	1	1		1								1	1994	1	1	1	1	1	1	1994-2003	1994-2003	1994-2003	1	Policy-Based/Repressive	0
Mozambique	541	Liberation Front of Mozambique (FRELIMO)	1962	2004	N	1	Revolution	Election	N/A	0	0	1		1
Myanmar	775	N		1958	1959					1	1				1
Myanmar	775	Burma Socialist Programme Party (BSPP)	1962	1962	1987	0	Military	Military	Coup	0	0	0		1
Myanmar	775	N		1988	2009					0	0				1
Myanmar	775	Union Solidarity and Development Party	2010	2010	2015	1	Military	Military	Election	0	0	0		0
Namibia	565	South West Africa People's Organization (SWAPO)	1960	1990	N	1	Revolution	Revolution	N/A	0	0	1		0
Nepal	790	N		1940	1990	0				1	1					1
Nepal	790	N		2002	2007	0				1	1					1
Nicaragua	93	Liberal Nationalist Party	1912	1936	1978	1	Elite Coalition	Dictator-Supported	Revolution	0	0	0		0								0	1984	0	0	0	0	0	0						0
Nicaragua	93	Sandinista National Liberation Front	1961	1979	1983	0	Revolution	Revolution	Continued	1	1	0		1								1	1984	1	1	1	1	1	1	1984-2015	1984-2015	1984-1990, 2006-2015	1	Policy-Based	0
Niger	436	Nigerien Progressive Party-African Democratic Rally (PPN-RDA)	1946	1960	1973	0	Independence	Election	Coup	0	0	1		0								0	1993	1	0	0	1	0	0	1993-1995, 2004-2008					0
Niger	436	N		1974	1988	0				0	0				1
Niger	436	National Movement for the Development of Society (MNSD)	1989	1989	1992	0	Military	Military	Election	1	1	0		0								1	1993	1	1	1	1	1	1	1993-1995, 1999-2008, 2011-2015	1993-1995, 1999-2008, 2011-2015	1995, 1999-2008	1	Policy-Based	1
Niger	436	National Union of Independents for Democratic Renewal (UNIRD) / Rally for Democracy and Progress (RDP)	1996	1996	1998	1	Dictator-Created	Dictator-Created	Coup	1	0	0	1997	0								1	1999	1	1	0	1	1	0	1999-2008, 2011-2015	1999-2004		1	Repressive	1
Niger	436	N		2009	2010					1	1				1
Nigeria	475	N		1966	1978	0				1	1				1
Nigeria	475	N		1983	1988	0				0	0				1
Nigeria	475	N		1989	1992	1				0	0				1				1	Social Democratic Party, National Republican Convention
Nigeria	475	N		1993	1998	0				0	0				1
Nigeria	475	People's Democratic Party [Nigeria]	1998	1999	2014	1	Elite Coalition	Election	Election	1	1	0		0
Oman	698	N		1940	N					0	0					1
Pakistan	769	Muslim League	1947	1947	1949	1	Independence	Election	Continued	1	1	1		0
Pakistan	769	N		1956	1964	-1958				0	0				1
Pakistan	769	N		1965	1968	1				0	0				1				1	Convention Muslim League, Council Muslim League
Pakistan	769	N		1969	1971	1				1	1				1
Pakistan	770	N		1977	1987	0				1	1				1
Pakistan	770	N		1999	2001	1				0	0				1
Pakistan	770	Pakistan Muslim League (Q)	2002	2002	2007	1	Split	Election	Election	1	1	0		0								1	2008	1	1	0	1	1	0	2008-2015	2008-2013		1	Policy-Based/Repressive	1
Panama	95	National Revolutionary Party	1932	1939	1940	1	Elite Coalition	Election	Coup	0	0	0		0								0	1950	1	1	0	1	1	0	1950, 1952-1967, 1991-2015	1950, 1952-1967, 1991-2015				0
Panama	95	N		1941	1944					0	0
Panama	95	Liberal Union	1945	1945	1949	1	Merger	Election	Coup	1	0	0		0								1	1950	0	0	0	0	0	0				1	Policy-Based	0
Panama	95	Authentic Revolutionary Party (PRA)	1948	1951	1951	1	Dictator-Created	Coup	Election	1	1	0		0								1	1952	1	1	0	1	1	0	1952-1953	1952-1953		1	Policy-Based	0
Panama	95	N		1968	1978	0				0	0				1
Panama	95	Democratic Revolutionary Party	1979	1979	1990	1	Military	Military	Occupation	1	0	0		0								1	1991	1	1	1	1	1	1	1991-2015	1991-2015	1994-2009	1	Repressive	0
Paraguay	150	N		1940	1946					0	0				1
Paraguay	150	Republican National Association - Colorado Party (ANR-PC)	1887	1947	2002	1963	Dictator-Created	Dictator-Supported/Revolution	Election	1	1	0		0								1	2003	1	1	1	1	1	1	2003-2015	2003-2015	2003-2015	1	Clientelist	0
Peru	135	N		1940	1947	1				0	0				1				1	National Democratic Front, APRA, Conservative Coalition
Peru	135	N		1948	1955	0				1	1				1
Peru	135	N		1962	1962					1	1				1
Peru	135	N		1968	1979					1	1				1
Peru	135	Cambio 90 / Peru 2000	1990	1990	2000	1	Dictator-Created	Dictator-Created	Protests/Election	1	1	0		0								1	2001	1	0	0	1	0	0	2001-2013			1	Policy-Based	0
Philippines	840	Nacionalista Party	1907	1935	1941	1	Independence	Election	Occupation	0	0	1		0								1	1946	1	1	1	1	1	1	1946-1964, 1986-2015	1946-1964	1953-1964	1	Clientelist/Policy-Based	0
Philippines	840	N		1942	1945					1	1							1
Philippines	840	Nacionalista Party	1907	1965	1971	1	Independence	Election	Dictator-Supported	0	0	0		0								0	1986	1	0	0	1	0	0	1986-2015					0
Philippines	840	N		1972	1977	0				0	0
Philippines	840	New Society Movement (KBL)	1978	1978	1985	1	Dictator-Created	Dictator-Created	Protests/Election	1	1	0		0								1	1986	1	0	0	1	0	0	1986-2015			1	Clientelist/Repressive	0
Poland	290	N		1940	1945					0	0							1
Poland	290	Polish Workers' Party (PPR)	1942	1946	1947	1	Communist	Communist-Imposed	Merger	0	0	0		1								0	1989	0	0	0	0	0	0						0
Poland	290	Polish United Worker's Party (PZPR)	1948	1948	1988	-1951	Communist	Communist-Imposed	Protests/Election	1	1	0		1							1	1	1989	1	1	1	1	1	1	1990-2015	1990-2015	1993-2000	1	Policy-Based/Repressive	0
Portugal	235	National Union / National Popular Action	1930	1932	1973	0	Dictator-Created	Dictator-Created	Coup	0	0	0	1970	0								1	1976	0	0	0	0	0	0				1	Repressive	0
Portugal	235	N		1974	1975	1				1	1				1
Qatar	694	N		1971	N	0				0	0					1
Romania	360	N		1940	1946					0	0				1	1		1
Romania	360	Romanian Workers' Party (PMR) / Romanian Communist Party (PCR)	1921	1947	1989	0	Communist	Communist-Imposed	Protests/Election	0	0	0	1965	1								1	1991	0	0	0	0	0	0				1	Repressive	0
Romania	360	N		1990	1990					1	1
Russia	365	Unity	1999	1999	2000	1	Dictator-Created	Election	Merger	0	0	0		0
Russia	365	United Russia	2001	2001	N	1	Dictator-Created/Merger	Election	N/A	0	0	0		0							1
Rwanda	517	Parmehutu (Party of the Hutu Emancipation Movement)	1957	1962	1972	-1964	Revolution	Revolution	Coup	0	0	1		0
Rwanda	517	N		1973	1974					0	0				1
Rwanda	517	National Republican Movement for Development and Democracy / National Revolutionary Movement for Development	1975	1975	1993	1991	Dictator-Created	Dictator-Created	Revolution	0	0	0	1991	0
Rwanda	517	Rwandan Patriotic Front	1987	1994	N	1	Revolution	Revolution	N/A	0	0	0		0
Samoa	990	N		1962	1981	0				0	0
Samoa	990	Human Rights Protection Party	1979	1982	N	1	Elite Coalition	Election	N/A	0	0	0		0
San Marino	331	Sammarinese Fascist Party	1922	1923	1942	0	Elite Coalition	Foreign-Imposed	Protests	1	0	0		0
San Marino	331	N		1943	1944					1	1							1
Sao Tome and Principe	403	Movement for the Liberation of São Tomé and Príncipe (MLSTP) / Movement for the Liberation of São Tomé and Príncipe/Social Democratic Party (MLSTP/PSD)	1960	1975	1990	0	Revolution	Revolution	Election	1	1	1	1990	1								1	1991	1	1	1	1	1	1	1991-2015	1991-2015	1994-2006	1	Policy-Based	0
Saudi Arabia	670	N		1940	N	0				0	0					1
Senegal	433	Senegalese Progressive Union / Socialist Party of Senegal (PS)	1958	1960	1999	1974	Independence	Election	Election	1	1	1	1976	1								1	2000	1	1	0	1	1	0	2000-2015	2000-2007		1	Policy-Based	0
Serbia	347	Socialist Party of Serbia	1990	1991	1999	1	Dictator-Created	Dictator-Created	Protests/Election	1	1	1		1								1	2000	1	1	0	1	1	0	2000-2015	2000-2003, 2008-2015		1	Policy-Based/Repressive	1
Seychelles	591	Seychelles Democratic Party	1964	1976	1976	1	Elite Coalition	Election	Coup	0	0	1		0
Seychelles	591	Seychelles People's United Party / Seychelles Progressive People's Front / People's Party	1964	1977	N	1992	Independence	Coup	N/A	0	0	0	1978, 2009	1
Sierra Leone	451	N		1967	1967	0				0	0				1
Sierra Leone	451	All People's Congress (APC)	1962	1968	1991	-1977, 1991	Split	Dictator-Supported/Election	Coup	0	0	0		0								0	2002	1	1	1	1	1	1	2002-2015	2002-2015	2007-2015			1
Sierra Leone	451	N		1992	1995					0	0						1
Sierra Leone	451	Sierra Leone People's Party	1951	1996	1996	1	Elite Coalition	Election	Coup	0	0	0		0								0	2002	1	1	1	1	1	1	2002-2015	2002-2015	2002-2007	1	Policy-Based/Repressive	1
Sierra Leone	451	N		1997	1997					0	0				1
Sierra Leone	451	Sierra Leone People's Party	1951	1998	2001	1	Elite Coalition	Foreign-Imposed	Continued	1	1	0		0								1	2002	1	1	1	1	1	1	2002-2015	2002-2015	2002-2007	1	Policy-Based/Repressive	1
Singapore	830	People's Action Party	1954	1965	N	1	Independence	Election	N/A	0	0	1		0
Solomon Islands	940	N		2000	2000					0	0						1
Solomon Islands	940	People's Alliance Party	1979	2001	2005	1	Merger	Election	Election	1	1	0		0								1	2006	1	1	0	1	1	0	2006-2015	2006-2010		1	Policy-Based	1
Somalia	520	N		1969	1975					0	0				1
Somalia	520	Somali Revolutionary Socialist Party	1976	1976	1990	0	Military	Military	Civil War	0	0	0		1
Somalia	520	N		1991	N					0	0						1
South Africa	560	United Party	1934	1934	1947	1	Merger	Election	Election	0	0	0		0								0	1994	0	0	0	0	0	0						0
South Africa	560	National Party [South Africa]	1915	1948	1993	1	Elite Coalition	Election	Protests/Election	1	1	0		0								1	1994	1	1	0	1	1	0	1994-2005	1994-1999		1	Policy-Based/Repressive	1
South Sudan	626	Sudan People's Liberation Movement	1983	2011	N	1	Revolution	Revolution	N/A	0	0	1		0
Spain	230	Falange (FET-JONS)	1937	1939	1976	0	Revolution	Revolution	Election	1	1	0		0								1	1977	0	0	0	0	0	0				1	Repressive	0
Sri Lanka	780	United National Party (UNP)	1946	1977	1990	1	Elite Coalition	Election	Continued	1	1	0		0								1	1991	1	1	1	1	1	1	1991-2009	1991-2009	1991-1994, 2001-2004	1	Policy-Based	1
Sri Lanka	780	N		2010	N	1				0	0								1	Sri Lanka Freedom Party, United National Party
Sudan	625	N		1958	1964					1	1				1
Sudan	625	N		1969	1970					0	0				1
Sudan	625	Sudanese Socialist Union	1971	1971	1985	0	Dictator-Created	Dictator-Created	Coup	1	0	0		1								1	1986	0	0	0	0	0	0				1	Policy-Based/Repressive	0
Sudan	625	N		1989	1995					0	0				1
Sudan	625	National Congress Party	1996	1996	2011	2000	Dictator-Created	Dictator-Created	Continued	0	0	0		0
Sudan-North	624	National Congress Party	1996	2011	N	1	Dictator-Created	Dictator-Created	N/A	0	0	0		0
Suriname	115	N		1980	1987	0				1	1				1
Suriname	115	National Democratic Party (NDP) [Suriname]	1987	1990	1990	1	Dictator-Created	Dictator-Supported	Continued	1	1	0		0								1	1991	1	1	1	1	1	1	1991-2015	1991-2015	2010-2015	1	Clientelist	1
Swaziland	572	Imbokodvo National Movement	1964	1968	1972	1	Dictator-Created	Election	Dictator-Supported	0	0	1		0
Swaziland	572	N		1973	N					0	0					1
Syria	652	National Bloc	1928	1944	1946	1	Independence	Election	Split	0	0	1		0
Syria	652	National Party [Syria]	1947	1947	1948	1	Split	Dictator-Supported	Coup	0	0	0		0							1
Syria	652	People's Party	1947	1949	1950	1	Split	Election	Coup	0	0	0		0
Syria	652	N		1951	1951	0				0	0				1
Syria	652	Arab Liberation Movement	1952	1952	1953	0	Dictator-Created	Dictator-Created	Coup	0	0	0		0
Syria	652	N		1954	1957	1				0	0								1	National Party, People's Party
Syria	652	N		1958	1960					0	0
Syria	652	N		1961	1962					0	0				1
Syria	652	Ba'ath Party [Syria]	1940	1963	1965	0	Elite Coalition	Coup	Split	0	0	0		0
Syria	652	Syrian Ba'ath Party	1966	1966	N	1973	Dictator-Created/Split	Coup	N/A	0	0	0		0							1
Taiwan	713	Kuomintang	1911	1949	1995	1987	Revolution	Revolution	Continued	1	1	1		0								1	1996	1	1	1	1	1	1	1996-2015	1996-2015	1996-2001, 2008-2015	1	Policy-Based	1
Tajikistan	702	Communist Party of Tajikistan	1991	1991	1991	1	Communist	Election	Coup	0	0	1		1
Tajikistan	702	N		1992	1993	1				0	0						1
Tajikistan	702	People's Democratic Party [Tajikistan]	1994	1994	N	1	Dictator-Created	Dictator-Created	N/A	0	0	0		0
Tanzania	510	Tanganyika African National Union / Tanzania African National Union / Chama Cha Mapinduzi (Party of the Revolution)	1954	1961	N	0	Independence	Election	N/A	0	0	1	1964, 1977	1
Thailand	800	Khana Ratsadon (People's Party)	1927	1933	1943	0	Revolution	Coup	Election	0	0	0		0								0	1975	0	0	0	0	0	0						0
Thailand	800	N		1944	1945					0	0
Thailand	800	N		1946	1947	1				0	0								1	Constitutional Front Party, Democrat Party
Thailand	800	N		1948	1954					0	0				1
Thailand	800	Seri Manangkasila Party	1955	1955	1956	1	Dictator-Created	Dictator-Created	Coup	0	0	0		0								0	1975	0	0	0	0	0	0						0
Thailand	800	N		1957	1967					0	0				1
Thailand	800	United Thai People's Party	1968	1968	1971	1	Dictator-Created	Dictator-Created	Dictator-Supported	0	0	0		0								1	1975	0	0	0	0	0	0				1	Repressive	0
Thailand	800	N		1972	1974					1	1				1
Thailand	800	N		1976	1982					1	1				1
Thailand	800	N		1991	1991					1	1				1
Thailand	800	N		2006	2007					0	0				1
Thailand	800	People's Power Party	1998	2008	2008	1	Elite Coalition	Election	Coup	0	0	0		0								1	2011	1	1	1	1	1	1	2011-2013	2011-2013	2011-2013	0	Policy-Based	0
Thailand	800	N		2009	2010					1	1				1
Thailand	800	N		2014	2015					0	0				1
Togo	461	Party of Togolese Unity (Committee of Togolese Unity)	1941	1960	1962	1961	Independence	Election	Coup	0	0	1		0
Togo	461	N		1963	1968					0	0				1
Togo	461	Rally of the Togolese People (RPT) / Union for the Republic (UNIR)	1969	1969	N	1991	Dictator-Created	Dictator-Created	N/A	0	0	0	2012	0
Tonga	955	N		1970	1998	0				0	0					1
Tonga	955	N		1999	N	1				0	0					1			1	Human Rights and Democracy Movement, Democratic Party of the Friendly Islands, People's Democratic Party
Tunisia	616	Neo-Destour Party / Destourien Socialist Party / Constitutional Democratic Rally	1934	1956	2010	-1962, 1981	Independence	Dictator-Supported	Protests	0	0	1	1964, 1987	0
Tunisia	616	Ennahdha Party (Renaissance Party)	1989	2011	2013	1	Revolution	Election	Dictator-Supported	0	0	0		0
Tunisia	616	N		2014	2014					1	1
Turkey	640	Republican People's Party	1919	1923	1949	1946	Revolution	Revolution	Election	0	0	1	1924	0								0	1961	1	1	1	1	1	1	1961-1979, 1992-2015	1961-1979, 1992-2015	1961-1965, 1973-1979			0
Turkey	640	Democrat Party	1946	1950	1960	1	Elite Coalition	Election	Coup	1	0	0		0								1	1961	0	0	0	0	0	0				0	Policy-Based/Repressive	0
Turkey	640	N		1980	1982					1	1				1
Turkmenistan	701	Communist Party of the Turkmen SSR / Democratic Party of Turkmenistan	1924	1991	N	2012	Communist	Dictator-Supported	N/A	0	0	1	1991	1
Uganda	500	Uganda People's Congress	1960	1962	1970	-1968	Merger	Election	Coup	0	0	1		1								1	1980	1	1	1	1	1	1	1980-1984	1980-1984	1980-1984	1	Clientelist/Policy-Based	1
Uganda	500	N		1971	1979					1	1				1
Uganda	500	N		1985	2005					0	0
Uganda	500	National Resistance Movement	1985	2006	N	1	Revolution	Dictator-Supported	N/A	0	0	0		0
United Arab Emirates	696	N		1971	N					0	0					1
Uruguay	165	Colorado Party	1836	1934	1941	1	Elite Coalition	Military	Continued	1	1	0		0								1	1942	1	1	1	1	1	1	1942-1972, 1985-2015	1942-1972, 1985-2015	1942-1958, 1966-1972, 1985-1989, 1994-2004	1	Clientelist/Policy-Based	0
Uruguay	165	N		1973	1984	0				1	1				1
USSR	364	Communist Party of the Soviet Union	1912	1922	1991	0	Communist	Revolution	Dictator-Supported	1	1	0		1
Uzbekistan	704	Communist Party of Uzbekistan / People's Democratic Party of Uzbekistan	1925	1991	N	1	Communist	Election	N/A	0	0	1	1991	1
Venezuela	101	N		1940	1940					0	0				1
Venezuela	101	Party of the Government's Policies / Venezuelan Democratic Party	1941	1941	1944	0	Dictator-Created	Dictator-Created	Coup	0	0	0	1943	0								0	1959	0	0	0	0	0	0						0
Venezuela	101	Democratic Action	1941	1945	1947	1	Elite Coalition	Coup	Coup	0	0	0		0								0	1959	1	1	1	1	1	1	1959-2004	1959-2000	1959-1969, 1974-1979, 1983-2000			0
Venezuela	101	N		1948	1951					0	0				1
Venezuela	101	Independent Electoral Front (FEI)	1951	1952	1958	0	Dictator-Created	Dictator-Created	Coup	1	0	0		0								1	1959	0	0	0	0	0	0				1	Repressive	0
Venezuela	101	Fifth Republic Movement (MVR)	1997	2005	2006	1	Elite Coalition	Election	Merger	0	0	0		1
Venezuela	101	United Socialist Party of Venezuela (PSUV)	2007	2007	N	1	Dictator-Created/Merger	Dictator-Created	N/A	0	0	0		1							1
Vietnam (South)	817	Personalist Labor Revolutionary Party (Can Lao Party)	1954	1955	1962	0	Dictator-Created	Dictator-Created	Coup	0	0	1		0
Vietnam (South)	817	N		1963	1968					0	0						1
Vietnam (South)	817	National Social Democratic Front	1969	1969	1975	0	Dictator-Created	Dictator-Created	Revolution	0	0	0		0
Vietnam (North)	816	Vietnam Workers' Party (DLDV)	1930	1954	1975	0	Communist	Revolution	Continued	0	0	1		1
Vietnam	818	Vietnam Workers' Party (DLDV) / Communist Party of Vietnam (DCSV)	1930	1976	N	0	Communist	Revolution	N/A	0	0	1	1976	1
Yemen (North)	678	N		1940	1990					0	0				1	1	1
Yemen	679	N		1990	1992					0	0
Yemen	679	General People's Congress (MSA)	1982	1993	2014	1	Dictator-Created	Election	Revolution	0	0	0		0
Yemen	679	N		2015	2015					0	0						1
Yemen (South)	680	National Liberation Front / Yemeni Socialist Party	1963	1967	1990	0	Revolution	Revolution	Country Merger	0	0	1	1978	1
Yugoslavia	345	N		1940	1944					0	0							1
Yugoslavia	345	Communist Party of Yugoslavia / League of Communists of Yugoslavia	1919	1945	1989	0	Communist	Communist-Imposed	Split	0	0	0	1952	1
Yugoslavia	345	Socialist Party of Serbia	1990	1990	1991	1	Dictator-Created/Merger	Dictator-Created	Continued	0	0	0		1							1
Zambia	551	United National Independence Party	1959	1964	1990	-1971, 1990	Independence	Election	Election	0	0	1		0								0	2008	1	0	0	1	0	0	2008-2015					0
Zambia	551	Movement for Multi-party Democracy	1990	1991	2007	1	Elite Coalition	Election	Continued	1	1	0		0								1	2008	1	1	1	1	1	1	2008-2015	2008-2015	2008-2011	1	Policy-Based/Repressive	0
Zimbabwe	552	Rhodesian Front	1962	1965	1978	1	Elite Coalition	Election	Revolution	0	0	1		0
Zimbabwe	552	United African National Council	1979	1979	1979	1	Elite Coalition	Election	Election	0	0	0		0
Zimbabwe	552	Zimbabwe African National Union (ZANU) / Zimbabwe African National Union-Patriotic Front (ZANU-PF)	1963	1980	N	1	Revolution	Election	N/A	0	0	0	1987	0
